# Supplementary material for: Biophysical and Immunological Characterization and In Vivo Pharmacokinetics and Toxicology in Nonhuman Primates of the Anti-PD-1 Antibody Pembrolizumab
Source: Oxford University Press journal article supplement (doi:10.1158/1535-7163.mct-19-0774), 2020-03-30
Supplement: 15357163mct190774-sup-227033_3_supp_6073362_q6l45d.docx [file 15357163mct190774-sup-227033_3_supp_6073362_q6l45d.docx]

Supplementary Figure S1


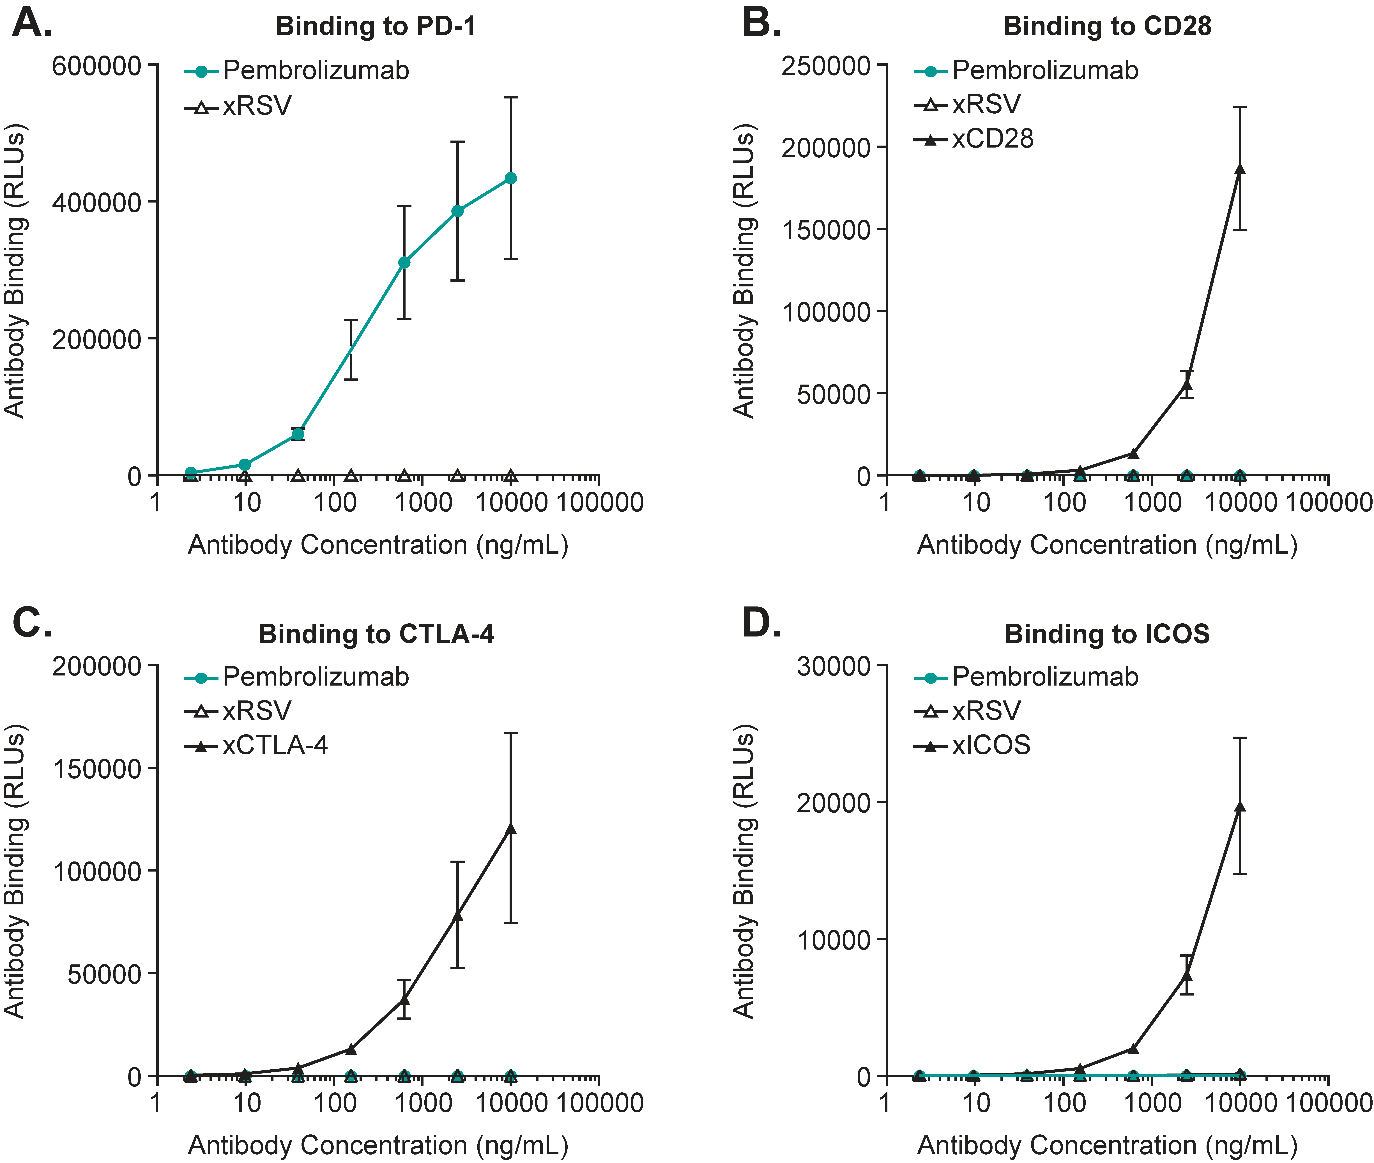


Supplementary Figure S1 shows that pembrolizumab does not bind to immunoglobulin superfamily members CD28, CTLA-4, or ICOS. The results of the electrochemiluminescence immunoassays ECL to assess pembrolizumab binding to immunoglobulin superfamily members are presented as mean relative luminescence units (RLU) ± standard error. **Panel A** shows binding of pembrolizumab and anti-RSV antibodies to plate-bound human PD-1. Binding to CD28, binding of pembrolizumab, anti-RSV, and anti-CD28 antibodies to plate-bound human CD28 is depicted in **Panel B**. **Panel C** shows binding to plate-bound CTLA-4. **Panel D** depicts binding to plate-bound ICOS.

xRSV = anti-RSV; xCD28 = anti-CD28; xCTLA4 = anti-CTLA-4; xICOS = anti-ICOS.
