# Supplementary material for: Biophysical and Immunological Characterization and In Vivo Pharmacokinetics and Toxicology in Nonhuman Primates of the Anti-PD-1 Antibody Pembrolizumab
Source: Oxford University Press journal article supplement (doi:10.1158/1535-7163.mct-19-0774), 2020-03-30
Supplement: 15357163mct190774-sup-227033_3_supp_6073363_q6l45d.docx [file 15357163mct190774-sup-227033_3_supp_6073363_q6l45d.docx]

Supplementary Figure S2


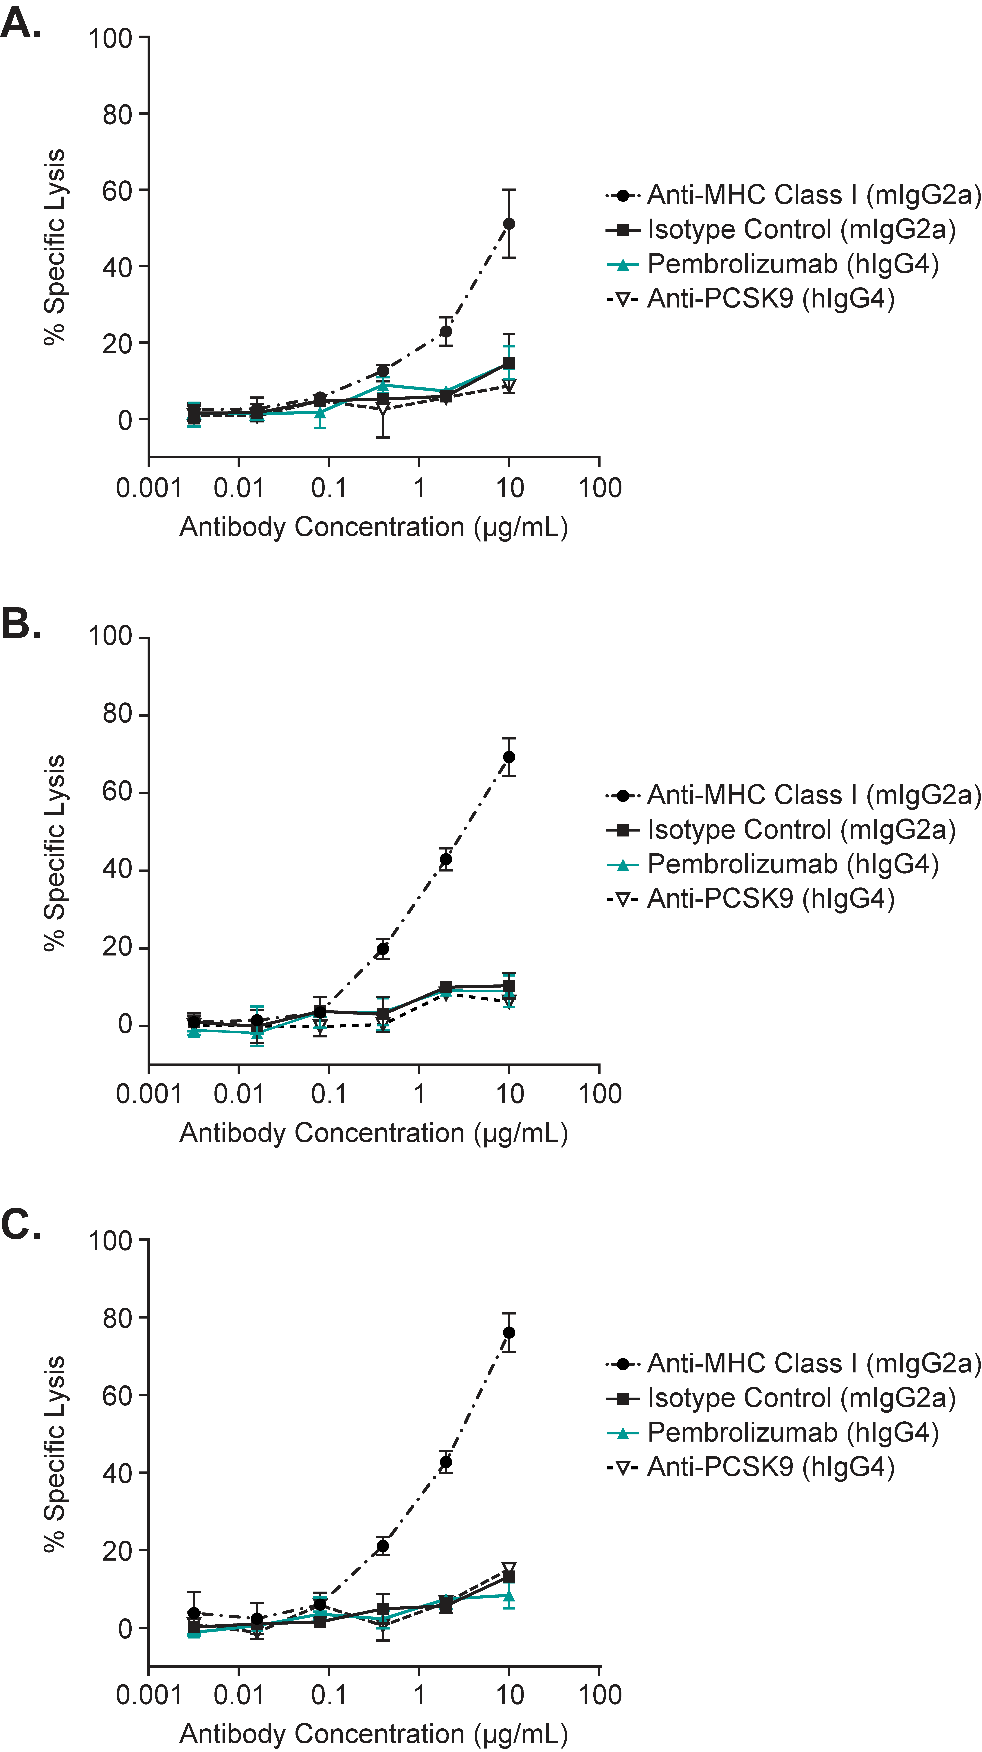


Supplementary Figure S2 shows that pembrolizumab does not induce antibody-dependent cell-mediated cytotoxicity (ADCC). ADCC assays were conducted using activated human PBMC as effector cells and activated human CD4+ T cells as target cells. The results are presented as mean ± standard deviation. Panels A-C each show the results from a single donor.
