# Supplementary material for: Biophysical and Immunological Characterization and In Vivo Pharmacokinetics and Toxicology in Nonhuman Primates of the Anti-PD-1 Antibody Pembrolizumab
Source: Oxford University Press journal article supplement (doi:10.1158/1535-7163.mct-19-0774), 2020-03-30
Supplement: 15357163mct190774-sup-227033_3_supp_6073364_q6l45d.docx [file 15357163mct190774-sup-227033_3_supp_6073364_q6l45d.docx]

Supplementary Figure S3


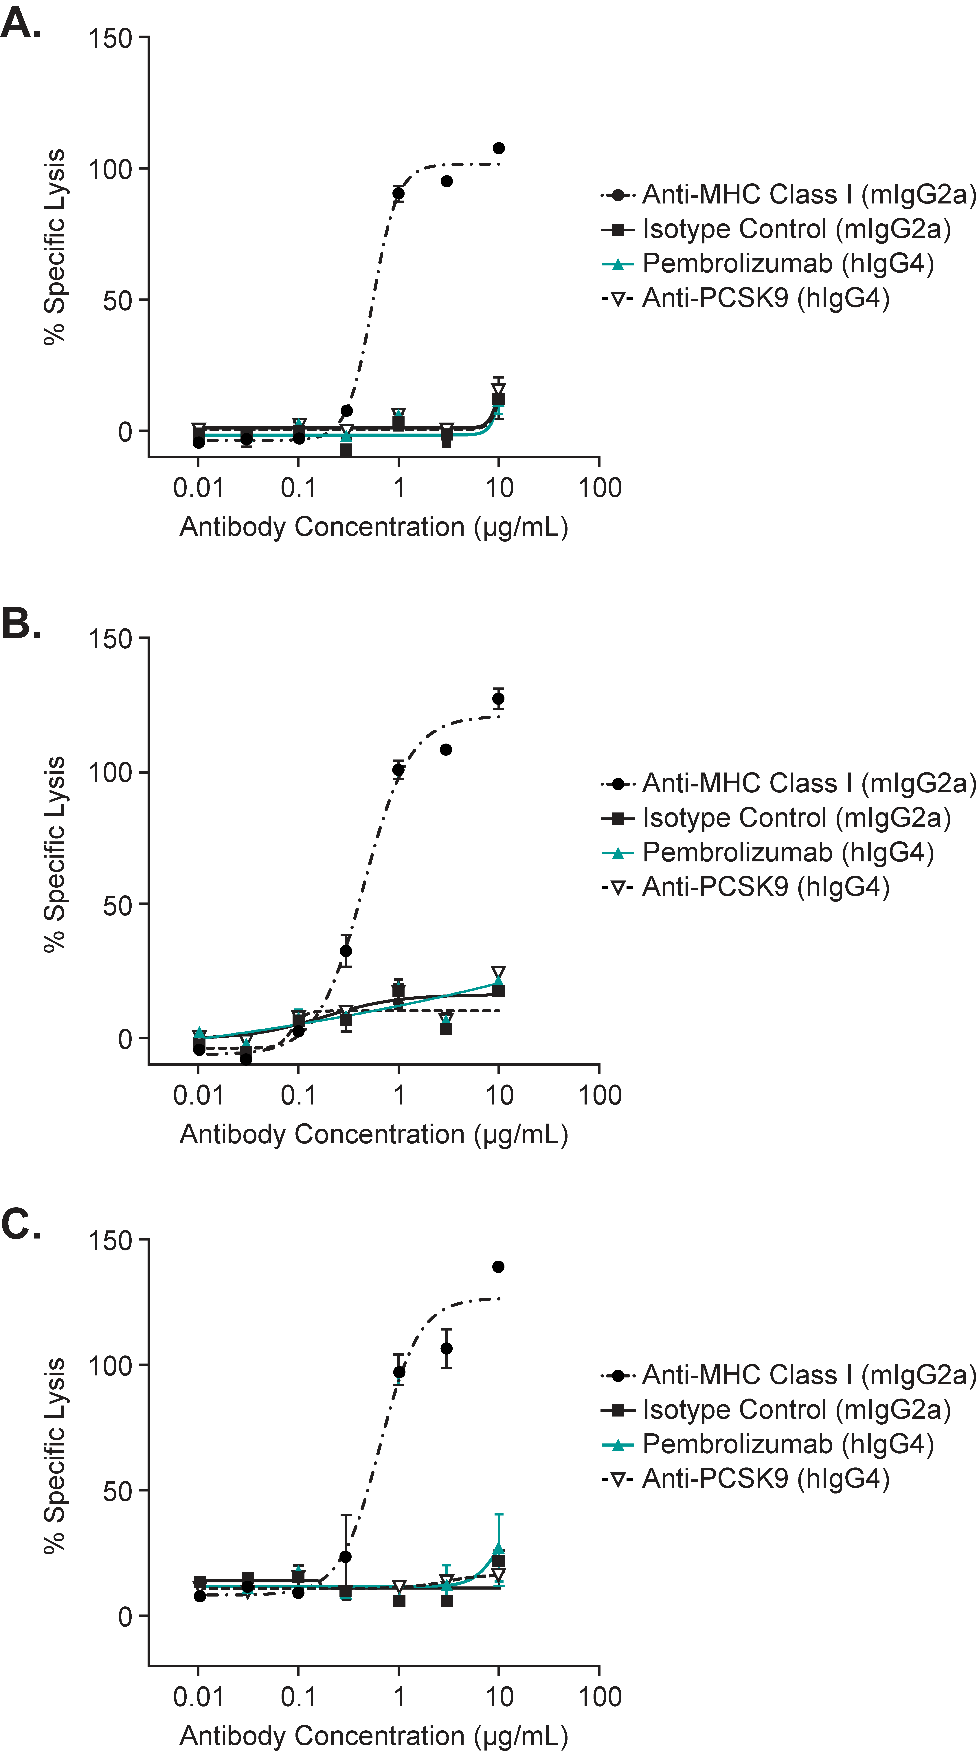


Supplementary Figure S3 shows that pembrolizumab does not induce complement-dependent cytotoxicity (CDC). CDC assays were conducted using activated human CD4+ T cells as target cells and human serum complement as effector molecules. The results are presented as mean ± standard deviation; for some data points, the degree of error was small enough to be contained within the area of the symbol for that data point.
Panels A-C each show the results from a single donor.
